# Supplementary material for: Constructing exact representations of quantum many-body systems with deep neural networks
Source: Springer Nature journal article supplement (doi:10.1038/s41467-018-07520-3), 2018-12-10
Supplement: 41467_2018_7520_MOESM2_ESM.pdf [file 41467_2018_7520_MOESM2_ESM.pdf]

## **Description of Additional Supplementary Files**

File Name: Supplementary Software 1

Description: tfi.py - Python script to generate a Deep Boltzmann Machine for the Transverse-Field Ising model on a hypercube

File Name: Supplementary Software 2

Description: heis\_1d-3h.py - Python script to generate a Deep Boltzmann Machine for the antiferromagnetic Heisenberg model in one dimension, following the 1d-3h construction as described in the paper

File Name: Supplementary Software 3

Description: heis\_2d-4h.py - Python script to generate a Deep Boltzmann Machine for the antiferromagnetic Heisenberg model in one dimension, following the 2d-4h construction as described in the paper

File Name: Supplementary Software 4

Description: heis\_2d-6h.py - Python script to generate a Deep Boltzmann Machine for the antiferromagnetic Heisenberg
